# Supplementary material for: Tailored design of protein nanoparticle scaffolds for multivalent presentation of viral glycoprotein antigens
Source: eLife. 2020 Aug 4;9:e57659. doi: 10.7554/eLife.57659 (PMC7402677; doi:10.7554/eLife.57659)
Supplement: Figure 6—source data 1. [file elife-57659-fig6-data1.xlsx]

## Sheet: TH-BS670-Hu&Rabbit 10nM
						HUMAN mAbs											RABBIT mAbs
	NP-BS-670-T33DN2-A5.2+St												NP-BS-670-T33DN2-A5.2+St
							moles	Number of molecules		mol NP/mol trimer									moles	Number of molecules		mol NP/mol trimer
	Abs	Conc.	RU	(pg/mm2)	pg	g	(g/NP mass)		Log10				Abs	Conc.	RU	(pg/mm2)	pg	g	(g/NP mass)		Log10
	VRC01	10 nM	201	201	45.024	4.5024e-11	2.55383e-17	1.53817e+07	7.187				11B	10 nM	231	231	51.744	5.1744e-11	2.935e-17	1.76775e+07	7.24742
			201	201	45.024	4.5024e-11	2.55383e-17	1.53817e+07	7.187						226	226	50.624	5.0624e-11	2.87147e-17	1.72949e+07	7.23792
				201	45.024	4.5024e-11	2.55383e-17	1.53817e+07	7.187	0.807192						228.5	51.184	5.1184e-11	2.90323e-17	1.74862e+07	7.24267	0.175455
				0	0	0	0	0	0							3.53553	0.79196	7.9196e-13	4.49211e-19	270560	0.00672002
				0	0	0	0	0	0							2.5	0.56	5.6e-13	3.1764e-19	191315	0.00475177
				0	0	0	0	0	0							1.09409	1.09409	1.09409	1.09409	1.09409	0.065608
	2G12	10 nM	531	531	118.944	1.18944e-10	6.74668e-17	4.06353e+07	7.6089
			520	520	116.48	1.1648e-10	6.60692e-17	3.97935e+07	7.59981				12N	10 nM	19	19	4.256	4.256e-12	2.41407e-18	1.45399e+06	6.16256
				525.5	117.712	1.17712e-10	6.6768e-17	4.02144e+07	7.60436	0.573464					20	20	4.48	4.48e-12	2.54112e-18	1.53052e+06	6.18484
				7.77817	1.74231	1.74231e-12	9.88265e-19	595232	0.00642843							19.5	4.368	4.368e-12	2.4776e-18	1.49226e+06	6.1737	0.0430273
				5.5	1.232	1.232e-12	6.98809e-19	420893	0.00454559							0.707107	0.158392	1.58392e-13	8.98423e-20	54112	0.0157518
				1.04662	1.04662	1.04662	1.04662	1.04662	0.0597761							0.5	0.112	1.12e-13	6.35281e-20	38263	0.0111382
																2.5641	2.5641	2.5641	2.5641	2.5641	0.180414
	PGT122	10 nM	117	117	26.208	2.6208e-11	1.48656e-17	8.95353e+06	6.95199
			111	111	24.864	2.4864e-11	1.41032e-17	8.49438e+06	6.92913
				114	25.536	2.5536e-11	1.44844e-17	8.72396e+06	6.94056	1.2717
				4.24264	0.950352	9.50352e-13	5.39054e-19	324672	0.0161665
				3	0.672	6.72e-13	3.81168e-19	229578	0.0114314
				2.63158	2.63158	2.63158	2.63158	2.63158	0.164705
	PGT145	10 nM	675	675	151.2	1.512e-10	8.57629e-17	5.1655e+07	7.71311
			633	633	141.792	1.41792e-10	8.04265e-17	4.84409e+07	7.68521
				654	146.496	1.46496e-10	8.30947e-17	5.0048e+07	7.69916	1.10818
				29.6985	6.65246	6.65246e-12	3.77338e-18	2.2727e+06	0.0197283
				21	4.704	4.704e-12	2.66818e-18	1.60704e+06	0.01395
				3.21101	3.21101	3.21101	3.21101	3.21101	0.181189
	PGT151	10 nM	258	258	57.792	5.7792e-11	3.27805e-17	1.97437e+07	7.29543
			253	253	56.672	5.6672e-11	3.21452e-17	1.93611e+07	7.28693
				255.5	57.232	5.7232e-11	3.24628e-17	1.95524e+07	7.29118	0.306286
				3.53553	0.79196	7.9196e-13	4.49211e-19	270560	0.00600983
				2.5	0.56	5.6e-13	3.1764e-19	191315	0.00424959
				0.978474	0.978474	0.978474	0.978474	0.978474	0.058284
	VRC34	10 nM	618	618	138.432	1.38432e-10	7.85207e-17	4.7293e+07	7.6748
			610	610	136.64	1.3664e-10	7.75043e-17	4.66808e+07	7.66914
				614	137.536	1.37536e-10	7.80125e-17	4.69869e+07	7.67197	0.23066
				5.65685	1.26714	1.26714e-12	7.18738e-19	432896	0.00400126
				4	0.896	8.96e-13	5.08225e-19	306104	0.00282932
				0.651466	0.651466	0.651466	0.651466	0.651466	0.0368787
	ACS202	10 nM	88	88	19.712	1.9712e-11	1.11809e-17	6.73428e+06	6.82829
			87	87	19.488	1.9488e-11	1.10539e-17	6.65776e+06	6.82333
				87.5	19.6	1.96e-11	1.11174e-17	6.69602e+06	6.82581	0.319445
				0.707107	0.158392	1.58392e-13	8.98423e-20	54112	0.00350967
				0.5	0.112	1.12e-13	6.35281e-20	38263	0.00248171
				0.571429	0.571429	0.571429	0.571429	0.571429	0.0363577
	3BC315	10 nM	26	26	5.824	5.824e-12	3.30346e-18	1.98967e+06	6.29878
			25	25	5.6	5.6e-12	3.1764e-18	1.91315e+06	6.28175
			17	17	3.808	3.808e-12	2.15995e-18	1.30094e+06	6.11426
			25	25	5.6	5.6e-12	3.1764e-18	1.91315e+06	6.28175
				23.25	5.208	5.208e-12	2.95406e-18	1.77923e+06	6.24413	0.121259
				4.19325	0.939288	9.39288e-13	5.32778e-19	320892	0.086956
				2.09662	0.469644	4.69644e-13	2.66389e-19	160446	0.043478
				9.01774	9.01774	9.01774	9.01774	9.01774	0.696301
0					HUMAN mAbs												RABBIT mAbs
	BS-670-T33DN2-A5.2+St
							moles	Number of molecules					BS-670-T33DN2-A5.2+St
	Abs	Conc.	RU	(pg/mm2)	pg	g	(g/trimer mass)		Log10										moles	Number of molecules
	VRC01	10 nM	50	50	11.2	1.12e-11	3.16384e-17	1.90558e+07	7.28003				Abs	Conc.	RU	(pg/mm2)	pg	g	(g/trimer mass)		Log10
			50	50	11.2	1.12e-11	3.16384e-17	1.90558e+07	7.28003				11B	10 nM	286	286	64.064	6.4064e-11	1.80972e-16	1.08999e+08	8.03742
				50	11.2	1.12e-11	3.16384e-17	1.90558e+07	7.28003						237	237	53.088	5.3088e-11	1.49966e-16	9.03246e+07	7.95581
				0	0	0	0	0	0							261.5	58.576	5.8576e-11	1.65469e-16	9.96619e+07	7.99661
				0	0	0	0	0	0							34.6482	7.7612	7.7612e-12	2.19243e-17	1.3205e+07	0.0577124
				0	0	0	0	0	0							24.5	5.488	5.488e-12	1.55028e-17	9.33735e+06	0.0408088
																9.36902	9.36902	9.36902	9.36902	9.36902	0.510326
	2G12	10 nM	186	186	41.664	4.1664e-11	1.17695e-16	7.08876e+07	7.85057
			182	182	40.768	4.0768e-11	1.15164e-16	6.93632e+07	7.84113
				184	41.216	4.1216e-11	1.16429e-16	7.01254e+07	7.84585				12N	10 nM	87	87	19.488	1.9488e-11	5.50508e-17	3.31571e+07	7.52058
				2.82843	0.633568	6.33568e-13	1.78974e-18	1.07796e+06	0.00667619						95	95	21.28	2.128e-11	6.0113e-17	3.62061e+07	7.55878
				2	0.448	4.48e-13	1.26554e-18	762233	0.00472078							91	20.384	2.0384e-11	5.75819e-17	3.46816e+07	7.53968
				1.08696	1.08696	1.08696	1.08696	1.08696	0.0601691							5.65685	1.26714	1.26714e-12	3.57948e-18	2.15592e+06	0.0270146
																4	0.896	8.96e-13	2.53107e-18	1.52447e+06	0.0191022
																4.3956	4.3956	4.3956	4.3956	4.3956	0.253355
	PGT122	10 nM	19	19	4.256	4.256e-12	1.20226e-17	7.24121e+06	6.85981
			17	17	3.808	3.808e-12	1.07571e-17	6.47898e+06	6.81151
				18	4.032	4.032e-12	1.13898e-17	6.86009e+06	6.83566
				1.41421	0.316784	3.16784e-13	8.9487e-19	538980	0.0341566
				1	0.224	2.24e-13	6.32768e-19	381116	0.0241523
				5.55556	5.55556	5.55556	5.55556	5.55556	0.353329
	PGT145	10 nM	122	122	27.328	2.7328e-11	7.71977e-17	4.64962e+07	7.66742
			115	115	25.76	2.576e-11	7.27684e-17	4.38284e+07	7.64176
				118.5	26.544	2.6544e-11	7.49831e-17	4.51623e+07	7.65459
				4.94975	1.10874	1.10874e-12	3.13204e-18	1.88643e+06	0.0181458
				3.5	0.784	7.84e-13	2.21469e-18	1.33391e+06	0.012831
				2.95359	2.95359	2.95359	2.95359	2.95359	0.167625
	PGT151	10 nM	168	168	37.632	3.7632e-11	1.06305e-16	6.40276e+07	7.80637
			167	167	37.408	3.7408e-11	1.05672e-16	6.36464e+07	7.80377
				167.5	37.52	3.752e-11	1.05989e-16	6.3837e+07	7.80507
				0.707107	0.158392	1.58392e-13	4.47435e-19	269490	0.00183339
				0.5	0.112	1.12e-13	3.16384e-19	190558	0.00129641
				0.298507	0.298507	0.298507	0.298507	0.298507	0.0166098
	VRC34	10 nM	536	536	120.064	1.20064e-10	3.39164e-16	2.04278e+08	8.31022
			533	533	119.392	1.19392e-10	3.37266e-16	2.03135e+08	8.30778
				534.5	119.728	1.19728e-10	3.38215e-16	2.03707e+08	8.309
				2.12132	0.475176	4.75176e-13	1.3423e-18	808470	0.00172363
				1.5	0.336	3.36e-13	9.49153e-19	571675	0.00121879
				0.280636	0.280636	0.280636	0.280636	0.280636	0.0146683
	ACS202	10 nM	55	55	12.32	1.232e-11	3.48023e-17	2.09614e+07	7.32142
			55	55	12.32	1.232e-11	3.48023e-17	2.09614e+07	7.32142
				55	12.32	1.232e-11	3.48023e-17	2.09614e+07	7.32142
				0	0	0	0	0	0
				0	0	0	0	0	0
				0	0	0	0	0	0
	3BC315	10 nM	42	42	9.408	9.408e-12	2.65763e-17	1.60069e+07	7.20431
			41	41	9.184	9.184e-12	2.59435e-17	1.56258e+07	7.19384
			37	37	8.288	8.288e-12	2.34124e-17	1.41013e+07	7.14926
			34	34	7.616	7.616e-12	2.15141e-17	1.2958e+07	7.11254
				38.5	8.624	8.624e-12	2.43616e-17	1.4673e+07	7.16499
				3.69685	0.828093	8.28093e-13	2.33925e-18	1.40893e+06	0.0423361
				1.84842	0.414047	4.14047e-13	1.16962e-18	704464	0.0211681
				4.8011	4.8011	4.8011	4.8011	4.8011	0.295438
